# Supplementary material
Source: PubMed Central journal article supplement (PMC7369123)

# Supplementary Material

## Cortical Complexity Analyses and Their Cognitive Correlate in Alzheimer's Disease and Frontotemporal Dementia

**Supplementary Figure 1.** Vertex-wise cortical thickness and fractal dimension reduction in the FTD subtypes compared to Controls (all FDR-corrected  $p < 0.05$ )

### CORTICAL THICKNESS

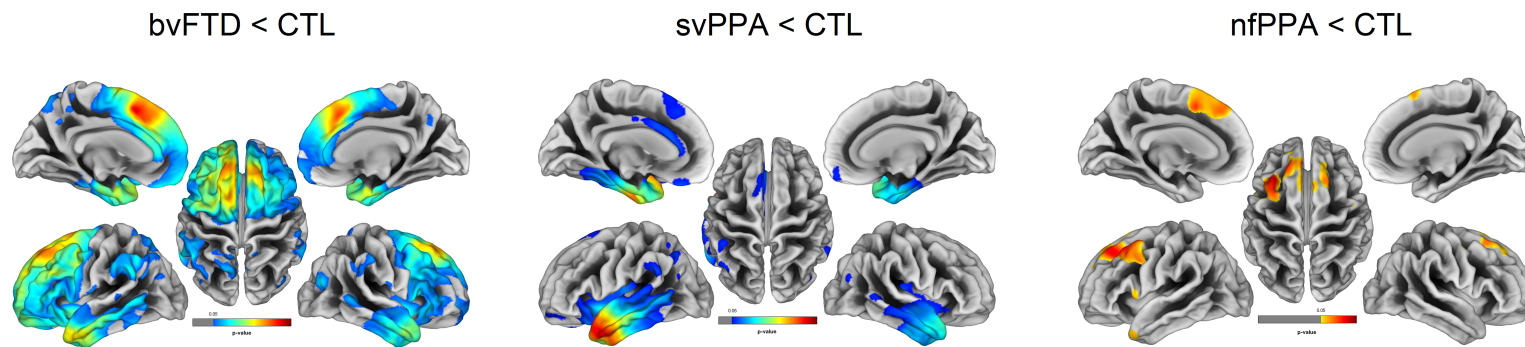

### FRACTAL DIMENSION

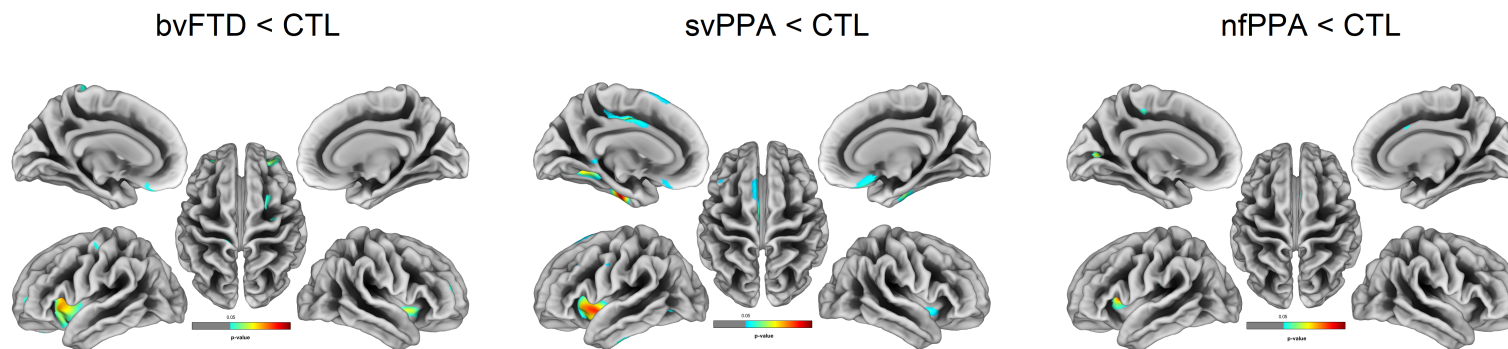

Supplement: jad-76-jad200246-s001.pdf [file jad-76-jad200246-s001.pdf]
